# Supplementary material
Source: HighWire-hosted journal article supplement (https://cmaj.ca/highwire/filestream/57782/field_highwire_adjunct_files/3/agents-online-appendix_4.pdf)
Supplement: agents-online-appendix_4.pdf [file agents-online-appendix_4.pdf]

#### Appendix 4 (as supplied by the authors): Quality assessment of included clinical trials

|                                                       | Aapro<br>2008 <sup>53</sup> | Gordon<br>2008 <sup>54</sup> | Smith<br>2008 <sup>55</sup> | Strauss<br>2008 <sup>54</sup> | Thomas<br>2008 <sup>55</sup> | Anon<br>2007 <sup>50</sup> | Charu<br>2007 <sup>61</sup> |
|-------------------------------------------------------|-----------------------------|------------------------------|-----------------------------|-------------------------------|------------------------------|----------------------------|-----------------------------|
| <b>Study Design</b>                                   |                             |                              |                             |                               |                              |                            |                             |
| Description of participant selection                  | Adequate                    | Adequate                     | Adequate                    | Adequate                      | Adequate                     | Partial                    | Adequate                    |
| Was the allocation to treatment concealed?*           | Adequate                    | Adequate                     | Unclear                     | Unclear                       | Unclear                      | Unclear                    | Unclear                     |
| Description of the therapeutic regimen                | Adequate                    | Adequate                     | Adequate                    | Adequate                      | Adequate                     | Partial                    | Adequate                    |
| Was the trial described as double blind?*             | No                          | Yes <sup>†</sup>             | Yes                         | No                            | No                           | Yes                        | No                          |
| Was there a description of withdrawals and dropouts?* | Yes (13%)                   | Yes (17%)                    | Yes (28%)                   | Yes (14%)                     | No                           | No                         | Partial (13%)               |
| <b>Statistical Analysis</b>                           |                             |                              |                             |                               |                              |                            |                             |
| Description of sample size calculation                | Yes                         | Yes                          | Yes                         | No                            | Yes                          | No                         | Yes                         |
| Was the design described as intention-to-treat?       | Yes                         | No                           | No                          | Yes                           | No                           | No                         | Yes                         |
| Was this a preliminary analysis?                      | No                          | No                           | No                          | No                            | No                           | No                         | Yes                         |
| <b>Presentation of Results</b>                        |                             |                              |                             |                               |                              |                            |                             |
| Were the dates of accrual reported?                   | Yes                         | Yes                          | Yes                         | Yes                           | Yes                          | Yes                        | No                          |
| Description of non-eligible patients                  | No                          | No                           | No                          | No                            | No                           | No                         | No                          |
| Were confidence intervals reported?                   | Yes                         | Yes                          | Yes                         | Yes                           | Yes                          | No                         | Yes                         |
| Were adverse events reported?                         | Yes                         | Yes                          | Yes                         | Yes                           | Yes                          | Yes                        | Yes                         |
| <b>Funding</b>                                        |                             |                              |                             |                               |                              |                            |                             |
| What were the source(s) of funding?*                  | Private                     | Private                      | Private                     | Private                       | Mixed                        | -                          | Private                     |

## Appendix 4 (continued)

|                                                       | Kosatek<br>2007 <sup>62</sup> | Machtay<br>2007 <sup>51</sup> | Overgaard<br>2007 <sup>63</sup> | Wright<br>2007 <sup>52</sup> | Anon A<br>2006 <sup>49</sup> | Anon B<br>2006 <sup>48</sup> | Wilkinson<br>2006 <sup>50</sup> |
|-------------------------------------------------------|-------------------------------|-------------------------------|---------------------------------|------------------------------|------------------------------|------------------------------|---------------------------------|
| <b>Study Design</b>                                   |                               |                               |                                 |                              |                              |                              |                                 |
| Description of participant selection                  | Adequate                      | Adequate                      | Partial                         | Adequate                     | Inadequate                   | Partial                      | Adequate                        |
| Was the allocation to treatment concealed?*           | Adequate                      | Adequate                      | Unclear                         | Adequate                     | Unclear                      | Unclear                      | Unclear                         |
| Description of the therapeutic regimen                | Adequate                      | Adequate                      | Adequate                        | Adequate                     | Adequate                     | Adequate                     | Adequate                        |
| Was the trial described as double blind?*             | Yes <sup>†</sup>              | No                            | No                              | Yes <sup>†</sup>             | No                           | No                           | No                              |
| Was there a description of withdrawals and dropouts?* | Yes (31%)                     | Partial (5%)                  | No                              | No                           | No                           | No                           | Partial (20%)                   |
| <b>Statistical Analysis</b>                           |                               |                               |                                 |                              |                              |                              |                                 |
| Description of sample size calculation                | No                            | No                            | No                              | Yes                          | No                           | No                           | Yes                             |
| Was the design described as intention-to-treat?       | Yes                           | No                            | No                              | Yes                          | Yes                          | Yes                          | Yes                             |
| Was this a preliminary analysis?                      | No                            | Yes                           | Yes                             | Yes                          | No                           | No                           | No                              |
| <b>Presentation of Results</b>                        |                               |                               |                                 |                              |                              |                              |                                 |
| Were the dates of accrual reported?                   | Yes                           | Yes                           | Yes                             | Yes                          | No                           | No                           | Yes                             |
| Description of non-eligible patients                  | No                            | No                            | No                              | No                           | No                           | No                           | No                              |
| Were confidence intervals reported?                   | Yes                           | Yes                           | Yes                             | Yes                          | No                           | No                           | Yes                             |
| Were adverse events reported?                         | Yes                           | Yes                           | No                              | Yes                          | No                           | No                           | Yes                             |
| <b>Funding</b>                                        |                               |                               |                                 |                              |                              |                              |                                 |
| What were the source(s) of funding?*                  | Private                       | Mixed                         | Mixed                           | Private                      | Private                      | Private                      | Private                         |

## Appendix 4 (continued)

|                                                        | Chang<br>2005 <sup>43</sup> | Christodoulakis<br>2005 <sup>44</sup> | Mystakidou<br>2005 <sup>45</sup> | O'Shaughnessy<br>2005 <sup>46</sup> | Savonijje<br>2005 <sup>3</sup> | Taylor<br>2005 <sup>59</sup> | Witzig<br>2005 <sup>47</sup> | Bamias<br>2003 <sup>36</sup> |
|--------------------------------------------------------|-----------------------------|---------------------------------------|----------------------------------|-------------------------------------|--------------------------------|------------------------------|------------------------------|------------------------------|
| <b>Study Design</b>                                    |                             |                                       |                                  |                                     |                                |                              |                              |                              |
| Description of participant selection                   | Adequate                    | Partial                               | Adequate                         | Adequate                            | Adequate                       | Partial                      | Adequate                     | Adequate                     |
| Was the allocation to treatment concealed? *           | Unclear                     | Adequate                              | Unclear                          | Adequate                            | Adequate                       | Unclear                      | Unclear                      | Unclear                      |
| Description of the therapeutic regimen                 | Adequate                    | Adequate                              | Adequate                         | Adequate                            | Adequate                       | Partial                      | Adequate                     | Adequate                     |
| Was the trial described as double blind? *             | No                          | No                                    | Yes                              | Yes                                 | No                             | Yes                          | Yes                          | No                           |
| Was there a description of withdrawals and dropouts? * | Partial (18%)               | Partial (-)                           | Yes (27%)                        | Yes (16%)                           | Partial (1%)                   | No                           | Yes (29%)                    | Yes (21%)                    |
| <b>Statistical Analysis</b>                            |                             |                                       |                                  |                                     |                                |                              |                              |                              |
| Description of sample size calculation                 | Yes                         | No                                    | Yes                              | No                                  | Yes                            | No                           | Yes                          | Yes                          |
| Was the design described as intention-to-treat?        | No                          | Yes                                   | Yes                              | Yes                                 | Yes                            | No                           | Yes                          | No                           |
| Was this a preliminary analysis?                       | No                          | No                                    | No                               | No                                  | No                             | No                           | No                           | No                           |
| <b>Presentation of Results</b>                         |                             |                                       |                                  |                                     |                                |                              |                              |                              |
| Were the dates of accrual reported?                    | No                          | Yes                                   | No                               | Yes                                 | Yes                            | No                           | Yes                          | Yes                          |
| Description of non-eligible patients                   | No                          | No                                    | No                               | No                                  | No                             | No                           | No                           | No                           |
| Were confidence intervals reported?                    | No                          | No                                    | No                               | No                                  | No                             | Yes                          | Yes                          | Yes                          |
| Were adverse events reported?                          | Yes                         | Yes                                   | No                               | Yes                                 | Yes                            | No                           | Yes                          | Yes                          |
| <b>Funding</b>                                         |                             |                                       |                                  |                                     |                                |                              |                              |                              |
| What were the source(s) of funding? *                  | Private                     | -                                     | -                                | -                                   | Private                        | Private                      | Private                      | -                            |

## Appendix 4 (continued)

|                                                       | Boogaerts<br>2003 <sup>37</sup> | Hedenus<br>2003 <sup>57</sup> | Henke<br>2003 <sup>38</sup> | Iconomou<br>2003 <sup>39</sup> | Janinis<br>2003 <sup>40</sup> | Kosmadakis<br>2003 <sup>41</sup> | Kotasek<br>2003 <sup>58</sup> | Recasens<br>2003 <sup>42</sup> |
|-------------------------------------------------------|---------------------------------|-------------------------------|-----------------------------|--------------------------------|-------------------------------|----------------------------------|-------------------------------|--------------------------------|
| <b>Study Design</b>                                   |                                 |                               |                             |                                |                               |                                  |                               |                                |
| Description of participant selection                  | Adequate                        | Adequate                      | Adequate                    | Adequate                       | Inadequate                    | Partial                          | Adequate                      | Partial                        |
| Was the allocation to treatment concealed?*           | Unclear                         | Adequate                      | Adequate                    | Unclear                        | Unclear                       | Unclear                          | Unclear                       | Unclear                        |
| Description of the therapeutic regimen                | Adequate                        | Adequate                      | Adequate                    | Adequate                       | Partial                       | Adequate                         | Adequate                      | Adequate                       |
| Was the trial described as double blind?*             | No                              | Yes <sup>†</sup>              | Yes <sup>†</sup>            | No                             | No                            | Yes                              | Yes                           | No                             |
| Was there a description of withdrawals and dropouts?* | Partial (19%)                   | Yes (13%)                     | Partial (39%)               | Partial (5%)                   | No                            | Partial (-)                      | Yes (25%)                     | No                             |
| <b>Statistical Analysis</b>                           |                                 |                               |                             |                                |                               |                                  |                               |                                |
| Description of sample size calculation                | Yes                             | Yes                           | Yes                         | No                             | No                            | No                               | Yes                           | No                             |
| Was the design described as intention-to-treat?       | Yes                             | Yes                           | Yes                         | No                             | No                            | No                               | No                            | Yes                            |
| Was this a preliminary analysis?                      | No                              | No                            | Yes                         | No                             | No                            | No                               | No                            | No                             |
| <b>Presentation of Results</b>                        |                                 |                               |                             |                                |                               |                                  |                               |                                |
| Were the dates of accrual reported?                   | Yes                             | No                            | Yes                         | Yes                            | No                            | Yes                              | No                            | Yes                            |
| Description of non-eligible patients                  | No                              | No                            | No                          | No                             | No                            | No                               | No                            | No                             |
| Were confidence intervals reported?                   | Yes                             | Yes                           | No                          | No                             | No                            | Yes                              | Yes                           | No                             |
| Were adverse events reported?                         | Yes                             | Yes                           | No                          | Yes                            | No                            | Yes                              | Yes                           | No                             |
| <b>Funding</b>                                        |                                 |                               |                             |                                |                               |                                  |                               |                                |
| What were the source(s) of funding?*                  | -                               | Private                       | Private                     | -                              | -                             | -                                | Private                       | -                              |

## Appendix 4 (continued)

|                                                       | Huddart<br>2002 <sup>32</sup> | Osterborg<br>2002 <sup>33</sup> | Pronzato<br>2002 <sup>34</sup> | Thomas<br>2002 <sup>35</sup> | Vansteenkiste<br>2002 <sup>36</sup> | Dammacco<br>2001 <sup>30</sup> | Littlewood<br>2001 <sup>31</sup> | Qvist<br>1999 <sup>29</sup> |
|-------------------------------------------------------|-------------------------------|---------------------------------|--------------------------------|------------------------------|-------------------------------------|--------------------------------|----------------------------------|-----------------------------|
| <b>Study Design</b>                                   |                               |                                 |                                |                              |                                     |                                |                                  |                             |
| Description of participant selection                  | Inadequate                    | Adequate                        | Partial                        | Inadequate                   | Adequate                            | Adequate                       | Adequate                         | Partial                     |
| Was the allocation to treatment concealed?*           | Unclear                       | Unclear                         | Unclear                        | Unclear                      | Adequate                            | Unclear                        | Unclear                          | Unclear                     |
| Description of the therapeutic regimen                | Adequate                      | Adequate                        | Partial                        | Partial                      | Adequate                            | Adequate                       | Adequate                         | Adequate                    |
| Was the trial described as double blind?*             | No                            | Yes                             | No                             | No                           | Yes <sup>†</sup>                    | Yes                            | Yes                              | Yes                         |
| Was there a description of withdrawals and dropouts?* | No                            | Partial (8%)                    | No                             | No                           | Yes (21%)                           | Yes (12%)                      | Yes (9%)                         | Partial (19%)               |
| <b>Statistical Analysis</b>                           |                               |                                 |                                |                              |                                     |                                |                                  |                             |
| Description of sample size calculation                | No                            | Yes                             | No                             | No                           | Yes                                 | No                             | No                               | No                          |
| Was the design described as intention-to-treat?       | No                            | Yes                             | Yes                            | No                           | No                                  | Yes                            | Yes                              | No                          |
| Was this a preliminary analysis?                      | No                            | No                              | No                             | No                           | No                                  | No                             | No                               | No                          |
| <b>Presentation of Results</b>                        |                               |                                 |                                |                              |                                     |                                |                                  |                             |
| Were the dates of accrual reported?                   | No                            | Yes                             | No                             | No                           | Yes                                 | No                             | No                               | No                          |
| Description of non-eligible patients                  | No                            | No                              | No                             | No                           | No                                  | No                             | No                               | No                          |
| Were confidence intervals reported?                   | Yes                           | No                              | Yes                            | No                           | Yes                                 | No                             | No                               | Yes                         |
| Were adverse events reported?                         | No                            | Yes                             | No                             | No                           | Yes                                 | Yes                            | Yes                              | Yes                         |
| <b>Funding</b>                                        |                               |                                 |                                |                              |                                     |                                |                                  |                             |
| What were the source(s) of funding?*                  | -                             | Private                         | -                              | -                            | -                                   | Private                        | Private                          | Private                     |

## Appendix 4 (continued)

|                                                        | Anon<br>1998 <sup>23</sup> | Dammacco<br>1998 <sup>24</sup> | Ferrini<br>1998 <sup>25</sup> | Kettelhack<br>1998 <sup>26</sup> | Oberhoff<br>1998 <sup>27</sup> | Ten Bokkel<br>Huinink<br>1998 <sup>28</sup> | Osterborg<br>1996 <sup>21</sup> | Park<br>1996 <sup>22</sup> |
|--------------------------------------------------------|----------------------------|--------------------------------|-------------------------------|----------------------------------|--------------------------------|---------------------------------------------|---------------------------------|----------------------------|
| <b>Study Design</b>                                    |                            |                                |                               |                                  |                                |                                             |                                 |                            |
| Description of participant selection                   | Adequate                   | Adequate                       | Partial                       | Partial                          | Adequate                       | Adequate                                    | Adequate                        | Inadequate                 |
| Was the allocation to treatment concealed? *           | Unclear                    | Unclear                        | Unclear                       | Unclear                          | Unclear                        | Adequate                                    | Adequate                        | Unclear                    |
| Description of the therapeutic regimen                 | Adequate                   | Adequate                       | Adequate                      | Adequate                         | Adequate                       | Adequate                                    | Adequate                        | Adequate                   |
| Was the trial described as double blind? *             | Yes                        | No                             | Yes                           | Yes                              | No                             | No                                          | No                              | No                         |
| Was there a description of withdrawals and dropouts? * | No                         | Yes (11%)                      | Yes (8%)                      | Yes (10%)                        | Partial (40%)                  | Partial (30%)                               | No                              | No                         |
| <b>Statistical Analysis</b>                            |                            |                                |                               |                                  |                                |                                             |                                 |                            |
| Description of sample size calculation                 | No                         | No                             | No                            | Yes                              | Yes                            | No                                          | No                              | No                         |
| Was the design described as intention-to-treat?        | Yes                        | Yes                            | Yes                           | No                               | No                             | Yes                                         | No                              | No                         |
| Was this a preliminary analysis?                       | No                         | No                             | No                            | Yes                              | No                             | No                                          | No                              | No                         |
| <b>Presentation of Results</b>                         |                            |                                |                               |                                  |                                |                                             |                                 |                            |
| Were the dates of accrual reported?                    | Yes                        | No                             | No                            | No                               | No                             | Yes                                         | No                              | No                         |
| Description of non-eligible patients                   | No                         | No                             | No                            | No                               | No                             | No                                          | No                              | No                         |
| Were confidence intervals reported?                    | No                         | Yes                            | No                            | Yes                              | No                             | Yes                                         | No                              | No                         |
| Were adverse events reported?                          | Yes                        | Yes                            | No                            | Yes                              | Yes                            | Yes                                         | Yes                             | No                         |
| <b>Funding</b>                                         |                            |                                |                               |                                  |                                |                                             |                                 |                            |
| What were the source(s) of funding? *                  | Private                    | -                              | -                             | -                                | Private                        | -                                           | -                               | -                          |

## Appendix 4 (continued)

|                                                       | Cazzola<br>1995 <sup>20</sup> | Cascinu<br>1994 <sup>18</sup> | Rose<br>1994 <sup>19</sup> | Abels<br>1993 A <sup>17</sup> | Abels<br>1993 B <sup>17</sup> | Abels<br>1993 C <sup>17</sup> |
|-------------------------------------------------------|-------------------------------|-------------------------------|----------------------------|-------------------------------|-------------------------------|-------------------------------|
| <b>Study Design</b>                                   |                               |                               |                            |                               |                               |                               |
| Description of participant selection                  | Partial                       | Adequate                      | Partial                    | Adequate                      | Adequate                      | Adequate                      |
| Was the allocation to treatment concealed?*           | Unclear                       | Adequate                      | Unclear                    | Unclear                       | Unclear                       | Unclear                       |
| Description of the therapeutic regimen                | Adequate                      | Adequate                      | Adequate                   | Adequate                      | Adequate                      | Adequate                      |
| Was the trial described as double blind?*             | No                            | Yes <sup>†</sup>              | Yes                        | Yes                           | Yes                           | Yes                           |
| Was there a description of withdrawals and dropouts?* | Partial (8%)                  | No                            | No                         | No                            | No                            | No                            |
| <b>Statistical Analysis</b>                           |                               |                               |                            |                               |                               |                               |
| Description of sample size calculation                | Yes                           | No                            | No                         | No                            | No                            | No                            |
| Was the design described as intention-to-treat?       | Yes                           | No                            | No                         | No                            | No                            | No                            |
| Was this a preliminary analysis?                      | No                            | No                            | No                         | No                            | No                            | No                            |
| <b>Presentation of Results</b>                        |                               |                               |                            |                               |                               |                               |
| Were the dates of accrual reported?                   | Yes                           | No                            | No                         | No                            | No                            | No                            |
| Description of non-eligible patients                  | No                            | No                            | No                         | No                            | No                            | No                            |
| Were confidence intervals reported?                   | Yes                           | No                            | No                         | No                            | No                            | No                            |
| Were adverse events reported?                         | No                            | Yes                           | No                         | Yes                           | Yes                           | Yes                           |
| <b>Funding</b>                                        |                               |                               |                            |                               |                               |                               |
| What were the source(s) of funding?*                  | Public                        | -                             | -                          | Private                       | Private                       | Private                       |

Note: "--" indicates that the value was not reported in the study; Mixed = public and private sources of funding.

\*Items have empirical evidence.

†Method of double-blinding was described and was appropriate.
